# Supplementary material
Source: publisher figshare collection journal article supplement (https://tandf.figshare.com/ndownloader/files/13675772)
Supplement: Supplementary file 1 [file 13675772]

## Supplementary Information

### Fifty-five-year longevity estimate for red steenbras *Petrus rupestris*, a South African endemic and the largest sparid

AH Andrews, MJ Smale, PD Cowley and N Chang

*African Journal of Marine Science* 40(4)

<https://doi.org/10.2989/1814232X.2018.1520148>

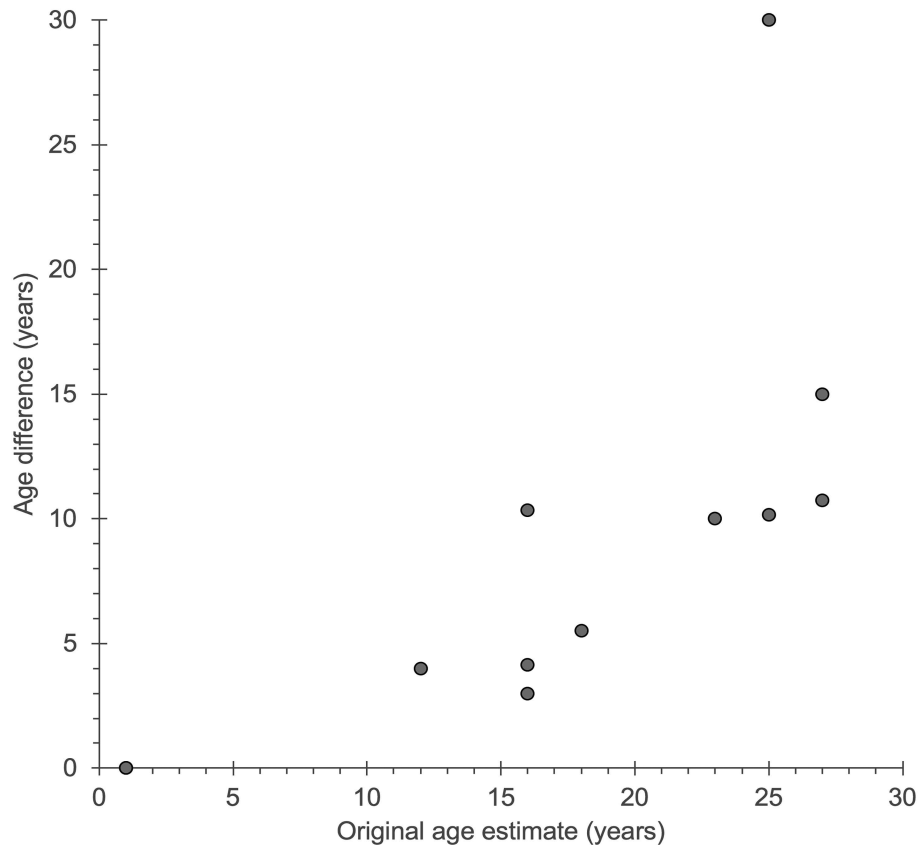

**Figure S1:** Plot of differences in the age reading from the original age estimates made by Smale and Punt (1991) for red steenbras *Petrus rupestris*. The revised age-reading pattern (see Figure 4 in main text) led to ages that were up to 30 years greater

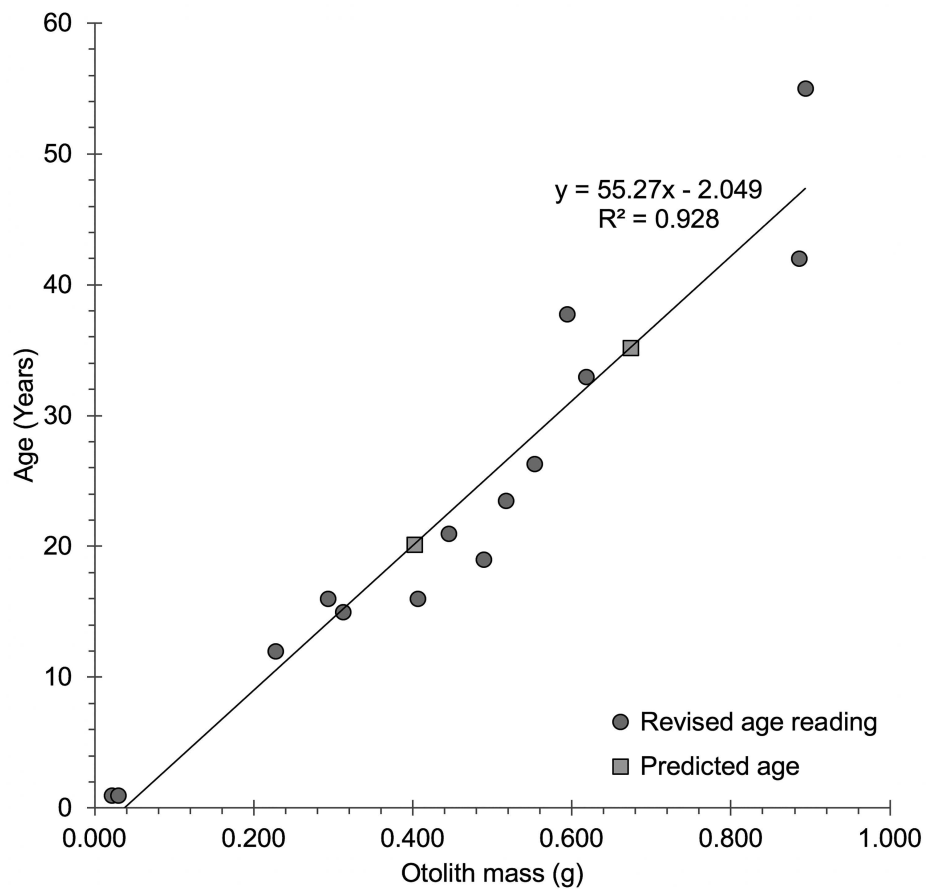

**Figure S2:** Plot of otolith mass versus estimated age used to predict age of red steenbras *Petrus rupestris* when an age reading from a thin-sectioned otolith was not well enough defined to make a final determination. Of the 17 fish in this study, a linear relationship was used to age two fish for which an age reading was not reliable

**FYZfYbW**

Smale MJ, Punt AE. 1991. Age and growth of the red steenbras *Petrus rupestris* (Pisces: Sparidae) on the south-east coast of South Africa. *South African Journal of Marine Science* 10: 131–139.
